# Supplementary material for: The origin of chow chows in the light of the East Asian breeds
Source: PubMed Central journal article supplement (PMC5312535; doi:10.1186/s12864-017-3525-9), 2017-02-16

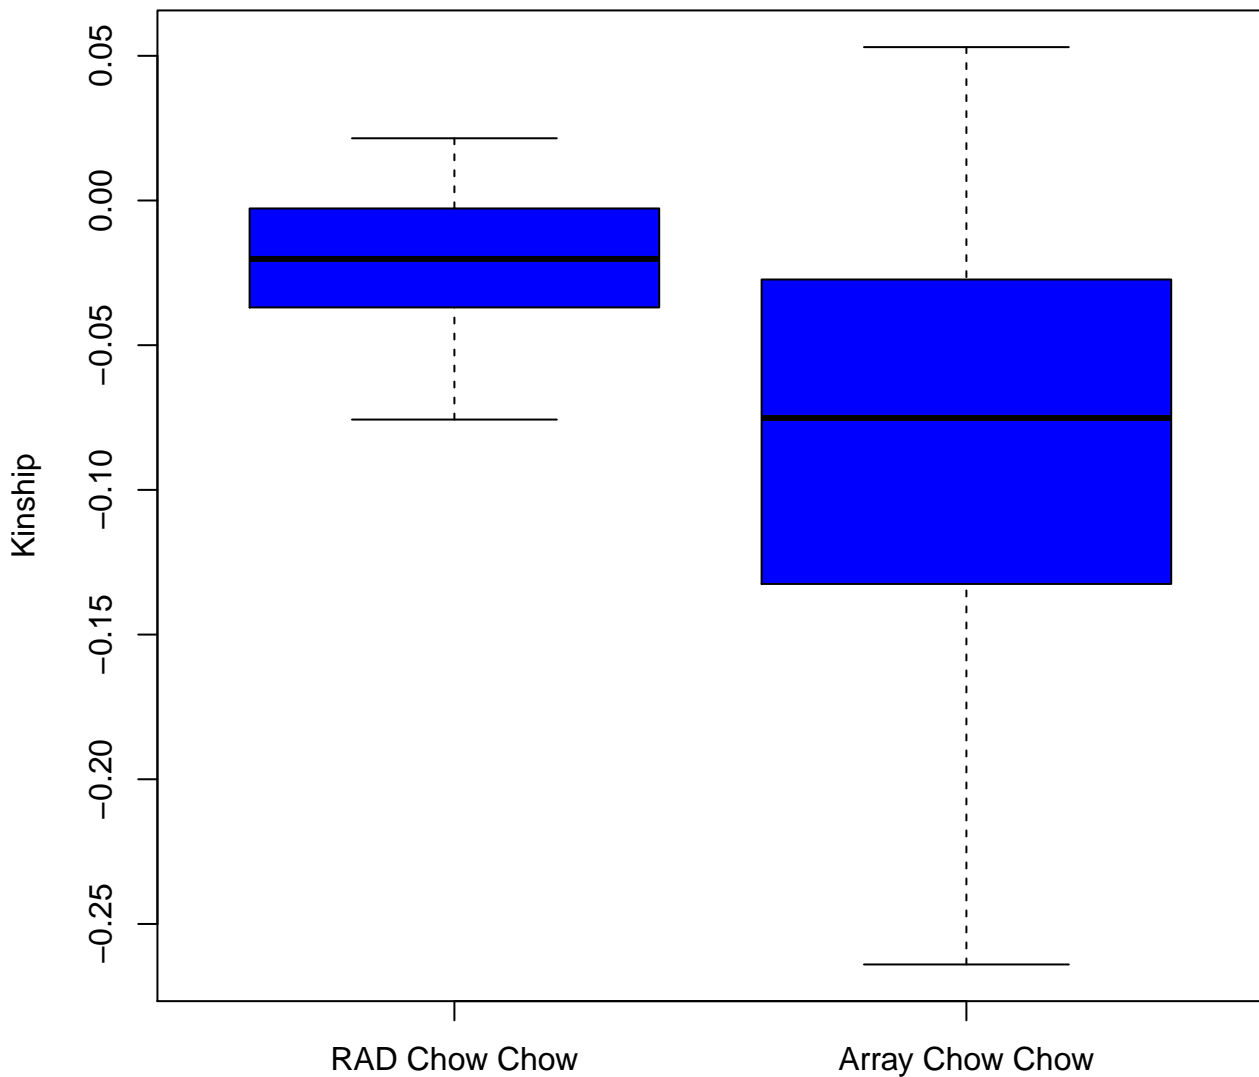

Supplement: 12864_2017_3525_MOESM3_ESM.pdf [file 12864_2017_3525_MOESM3_ESM.pdf]
